# Supplementary material
Source: publisher site journal article supplement (https://www.spandidos-publications.com/7039/downloadSupplementary)
Supplement: Supplementary file 1 [file downloadSupplementary]

## Sheet: Sheet1
Table SI. P-values and false discover rates of the comparisons between healthy individuals and groups of patients with diabetes.
Group comparison	Statistical analysis	Age	BMI	Systolic blood pressure	Diastolic blood pressure	Fasting blood sugar	Glycated hemoglobin	Insulin	Serum glutamic pyruvic aminotransferase	Serum glutamate oxaloacetate transaminase	Creatinine	Urea	Uric acid	Sodium	Potassium	Calcium	Estimated glomerular filtration rate	Lactate dehydrogenase	Troponin I	CK	CK-MB	miR-133a	miR-132	Long non-coding RNA megacluster	TNF-α	Nuclear erythroid 2-related factor 2
G1 vs. Con	P-value	2.1381e-06	1.5585e-10	0.875975	0.27223	1.3024e-31	4.7285e-45	2.3436e-05	0.299657	0.734172	0.578889	0.0394413	2.6647e-05	0.00232074	0.426782	0.0147877	0.907507	1.302e-06	0.00047022	2.4693e-06	1.3211e-06	0.00697761	0.043735	6.8626e-17	2.5299e-06	0.00064313
	FDR	7.6361e-06	9.7408e-10	0.912474	0.358198	1.6279e-30	1.1821e-43	5.8589e-05	0.374571	0.798013	0.657828	0.0580019	6.0562e-05	0.00414419	0.508073	0.0231058	0.907507	6.51e-06	0.00097963	7.7164e-06	5.5044e-06	0.0116294	0.060743	5.7188e-16	7.0276e-06	0.00123679
G2 vs. Con	P-value	4.9522e-10	2.7849e-05	0.00048409	0.00298879	6.3055e-20	3.3672e-39	4.1163e-33	0.206031	0.0538198	0.00774841	9.2459e-07	1.1509e-09	0.00200906	0.527763	0.0037828	1.6873e-25	5.3342e-10	1.0405e-06	9.7686e-09	2.2864e-05	2.7345e-14	3.8171e-08	4.1445e-24	0.0166669	4.8303e-05
	FDR	1.7686e-09	4.6414e-05	0.0007119	0.00393261	3.1528e-19	8.4181e-38	5.1454e-32	0.214616	0.0584998	0.0092243	1.9262e-06	3.1971e-09	0.00279037	0.527763	0.0047285	1.4061e-24	1.6669e-09	2.001e-06	2.4422e-08	4.0829e-05	1.1394e-13	8.6752e-08	2.5903e-23	0.0189397	7.5474e-05
G2 vs. G1	P-value	0.00078696	0.227977	0.00115899	0.0244779	0.0205625	0.00068119	2.4087e-26	0.541046	0.144903	0.0568019	0.00428884	0.0202784	0.904912	0.787896	0.392818	4.3899e-30	0.00401822	0.00215929	0.0196378	0.722201	2.3065e-09	0.00590085	8.3024e-10	0.19439	0.0110022
	FDR	0.00327901	0.284971	0.00413926	0.0382468	0.0342708	0.00340596	3.0108e-25	0.614825	0.201255	0.0835322	0.0107221	0.0362114	0.904912	0.820725	0.467641	1.0975e-28	0.0111617	0.00674777	0.037765	0.785001	1.4416e-08	0.013411	6.9187e-09	0.255777	0.0229213
G3a vs. Con	P-value	9.1867e-15	7.0547e-05	0.00045955	4.4259e-10	4.2506e-18	1.5025e-33	4.8847e-34	0.553078	0.0985012	6.0964e-15	8.8085e-15	2.5389e-15	4.9545e-07	0.0809111	4.2254e-07	2.981e-39	1.8755e-08	1.2561e-06	9.8908e-13	1.6056e-06	2.3269e-40	4.613e-25	1.6042e-24	0.000837	1.1584e-06
	FDR	2.0879e-14	8.8184e-05	0.00054708	8.5114e-10	1.5181e-17	9.3909e-33	4.0706e-33	0.553078	0.102605	1.6934e-14	2.2021e-14	7.934e-15	7.7413e-07	0.0879468	7.0424e-07	3.7262e-38	3.3491e-08	1.7446e-06	2.0606e-12	2.1126e-06	5.8171e-39	2.3065e-24	6.6842e-24	0.00095113	1.7035e-06
G3a vs. G1	P-value	2.6407e-10	0.00702939	0.00135092	8.6946e-09	0.256127	0.526545	6.8681e-29	0.840859	0.121801	1.0548e-11	6.1303e-11	1.4178e-05	0.01377	0.309302	0.00205335	5.6716e-46	0.00633891	0.00071433	4.9508e-06	0.371766	2.0302e-17	7.086e-09	1.6631e-11	0.366372	0.00012877
	FDR	9.431e-10	0.0103373	0.00241236	2.4152e-08	0.320159	0.548485	8.5851e-28	0.840859	0.160264	6.5923e-11	2.5543e-10	3.2223e-05	0.019125	0.368217	0.00342226	1.4179e-44	0.00990455	0.00137371	1.2377e-05	0.404093	1.6918e-16	2.2144e-08	8.3155e-11	0.416332	0.00026828
G3a vs. G2	P-value	0.00619787	0.274568	0.706728	0.00041033	0.329641	0.0196712	3.2953e-05	0.718961	0.983043	1.4841e-07	8.8923e-07	0.0208541	0.0167485	0.319145	0.0543728	5.3978e-19	0.711346	0.17779	0.00249156	0.676994	0.0572066	8.2244e-05	0.217916	0.389358	0.0420994
	FDR	0.0193683	0.403776	0.8031	0.00170972	0.433738	0.049178	0.00020596	0.748917	0.983043	1.8552e-06	7.4103e-06	0.0473957	0.0465235	0.443257	0.104563	1.3494e-17	0.773202	0.296317	0.00889843	0.805945	0.102155	0.00041122	0.340495	0.486698	0.087707
G3b vs. Con	P-value	5.5754e-17	3.9293e-09	6.3128e-06	2.8863e-12	1.9876e-25	6.0551e-44	1.269e-34	0.481604	0.00319235	8.3396e-23	1.2313e-19	4.7058e-19	7.281e-06	0.00612507	0.00241224	3.4071e-47	1.212e-05	0.00547446	1.3764e-05	0.00088208	7.0932e-35	0.0004389	4.7791e-32	9.6527e-08	2.7674e-06
	FDR	1.3938e-16	8.186e-09	1.0521e-05	6.5598e-12	8.2817e-25	7.5688e-43	7.9312e-34	0.481604	0.00362767	2.9784e-22	3.8477e-19	1.3072e-18	1.1377e-05	0.00638028	0.00287172	8.5176e-46	1.7823e-05	0.0059505	1.9116e-05	0.0011026	5.911e-34	0.00057751	2.3895e-31	1.8563e-07	4.9418e-06
G3a vs. G1	P-value	4.6051e-13	0.988004	2.3354e-05	1.9837e-10	0.0744487	1.9765e-05	1.6728e-29	0.559121	0.0470667	2.7575e-17	1.1012e-15	4.2036e-08	0.0615013	0.00778225	0.35538	1.9415e-54	0.084137	0.455047	0.559751	0.0226078	4.0593e-24	0.382351	1.3268e-19	4.4371e-05	1.2296e-05
	FDR	1.6447e-12	0.988004	4.8655e-05	6.199e-10	0.103401	4.492e-05	2.091e-28	0.60774	0.0735417	1.3788e-16	4.5882e-15	1.1677e-07	0.090443	0.0138969	0.444225	4.8539e-53	0.110707	0.517099	0.583074	0.0376797	3.3827e-23	0.455179	8.2926e-19	8.533e-05	3.074e-05
G3a vs. G2	P-value	7.5363e-05	0.25817	0.164594	6.3783e-06	0.436387	0.855972	3.7506e-06	0.933458	0.283607	1.0249e-14	1.8126e-13	0.00013633	0.030119	0.0815847	0.983702	1.6478e-31	1.1323e-05	0.00410869	0.00916328	0.0216765	0.00598325	0.176705	1.1471e-07	0.00598137	0.107709
	FDR	0.00026915	0.25817	0.342903	1.9932e-05	0.606093	1.94539	4.6882e-05	1.01463	0.443136	5.1246e-14	7.5526e-13	0.0003787	0.0442926	0.145687	1.22963	4.1196e-30	1.4898e-05	0.00466897	0.00954508	0.0361275	0.0498604	0.210363	7.1692e-07	0.0115026	0.269273
G3b vs. G3a	P-value	0.145033	0.0029447	0.251861	0.595305	0.704527	0.00190617	0.485785	0.882409	0.498611	4.8849e-08	4.7266e-07	0.00730755	0.63424	0.337144	0.0194442	1.7716e-16	6.6867e-05	0.00093498	9.1303e-07	0.00195696	0.0351142	0.00448306	5.7254e-05	5.0674e-05	0.122807
	FDR	0.213284	0.0066925	0.349807	0.676483	0.733883	0.00529491	0.607231	0.882409	0.593584	6.1062e-07	3.9388e-06	0.014053	0.689392	0.44361	0.0347217	4.4291e-15	0.00023881	0.00292182	5.7064e-06	0.00489241	0.0585237	0.0093397	0.00023856	0.00025337	0.191885
G4 vs. Con	P-value	2.334e-18	0.00164966	5.4111e-06	3.4492e-12	2.0622e-33	1.9354e-44	3.6466e-35	0.00692643	0.0277476	5.8939e-37	1.5507e-40	2.9667e-15	4.7289e-05	4.2171e-25	0.00412964	7.7792e-58	9.6691e-12	8.9575e-08	2.9935e-10	1.3777e-06	6.4125e-31	2.5046e-25	4.3438e-38	3.5678e-12	8.5696e-09
	FDR	5.3045e-18	0.00187462	6.7638e-06	6.6331e-12	7.3651e-33	2.4192e-43	1.5194e-34	0.00721503	0.0277476	2.9469e-36	1.2923e-39	6.1805e-15	5.6297e-05	1.0543e-24	0.00448873	1.9448e-56	1.6115e-11	1.2441e-07	4.6773e-10	1.8128e-06	2.0039e-30	6.9572e-25	2.7149e-37	6.371e-12	1.2602e-08
G4 vs. G1	P-value	3.8696e-15	0.00131308	4.0713e-05	5.5035e-10	0.860802	0.00134938	6.5163e-30	0.123554	0.0357018	1.1803e-30	1.5194e-32	1.4036e-07	0.0587491	2.1002e-22	0.404377	1.0806e-69	5.2896e-05	9.4459e-05	1.3471e-05	0.0331606	2.8338e-17	2.9935e-14	2.921e-21	1.2833e-10	9.7232e-10
	FDR	1.2092e-14	0.00182373	6.7856e-05	1.2508e-09	0.860802	0.0017755	4.0727e-29	0.134298	0.0425021	9.8359e-30	1.8993e-31	2.6992e-07	0.0667603	1.0501e-21	0.421226	2.7015e-68	8.265e-05	0.00013891	2.4055e-05	0.0414507	1.0121e-16	8.3152e-14	1.2171e-20	3.2083e-10	2.0257e-09
G4 vs. G2	P-value	1.4922e-06	0.0923178	0.0207438	8.7922e-07	0.00997074	0.154885	1.5268e-08	0.210873	0.66294	1.2645e-29	1.5514e-30	0.00048416	0.0595755	4.1663e-20	0.91069	6.7172e-46	0.0628215	0.144797	0.00146843	0.110107	0.00664756	1.7518e-11	1.1418e-07	0.00058019	5.1937e-06
	FDR	4.145e-06	0.121471	0.0324121	2.7476e-06	0.0166179	0.176006	6.3616e-08	0.229209	0.690563	1.0537e-28	1.9393e-29	0.00110036	0.0876111	2.6039e-19	0.91069	1.6793e-44	0.0872521	0.172378	0.0028239	0.137633	0.0118706	8.7589e-11	4.0778e-07	0.00120873	1.2984e-05
G4 vs. G3a	P-value	0.0078198	0.451679	0.0440984	0.0497563	0.182812	0.055521	0.00588782	0.112271	0.86065	6.1321e-27	4.7158e-26	0.0369094	0.821363	3.3274e-19	0.0308584	5.7237e-40	0.281754	0.792995	0.111734	0.158124	0.0284984	1.1508e-08	4.3838e-05	2.4076e-08	0.0130505
	FDR	0.0217217	0.513271	0.0787471	0.0829271	0.228516	0.0867516	0.0183994	0.155932	0.86065	7.6651e-26	3.9298e-25	0.0709796	0.855587	2.0796e-18	0.0642883	1.4309e-38	0.335421	0.861951	0.164314	0.208057	0.064769	5.7539e-08	0.00015656	1.0032e-07	0.0326262
G4 vs. G3b	P-value	0.204059	0.00315223	0.14189	0.0854333	0.0122242	0.121543	0.0545714	0.163778	0.317592	4.928e-21	4.7732e-17	0.756591	0.858009	2.7258e-19	0.769527	1.6101e-29	5.0724e-07	0.00035502	2.8981e-05	0.00104596	0.89006	1.6856e-11	0.0842329	0.498504	4.0498e-06
	FDR	0.268498	0.00716417	0.208661	0.142389	0.0254671	0.189912	0.104945	0.227469	0.39699	6.16e-20	2.9832e-16	0.859762	0.893759	2.2715e-18	0.836442	4.0252e-28	2.1135e-06	0.00098616	9.0565e-05	0.0026149	0.89006	8.4278e-11	0.150416	0.593458	1.4464e-05
G5 vs. Con	P-value	1.166e-13	1.5854e-06	0.00124926	2.2647e-07	3.1984e-23	2.0295e-30	9.3834e-37	0.405749	0.831556	1.4243e-30	1.2412e-33	4.7578e-17	2.5805e-07	2.0333e-15	2.5261e-16	5.9697e-67	1.8019e-06	7.2316e-06	1.1233e-10	1.4809e-09	1.3986e-35	2.522e-28	1.1701e-48	2.8416e-10	2.0323e-09
	FDR	2.2423e-13	1.9817e-06	0.00135789	3.1454e-07	8.8845e-23	7.2481e-30	7.8195e-36	0.422655	0.831556	5.9347e-30	6.206e-33	1.1894e-16	3.3954e-07	4.236e-15	5.7412e-16	1.4924e-65	2.1451e-06	8.2177e-06	2.0059e-10	2.3139e-09	8.741e-35	7.8813e-28	1.4626e-47	4.7359e-10	2.9886e-09
G4 vs. G1	P-value	5.0558e-08	0.089318	0.00387562	8.9665e-06	0.866456	0.507578	6.1918e-28	0.876858	0.981864	1.4546e-25	1.1742e-25	2.0072e-07	9.87e-08	1.289e-14	6.13e-10	8.2899e-76	0.00014987	0.00331733	2.0918e-06	9.3885e-05	4.6658e-18	1.242e-16	3.8143e-24	2.3336e-10	7.6382e-08
	FDR	1.1491e-07	0.106331	0.00484453	1.401e-05	0.9418	0.576793	7.7398e-27	0.913394	0.981864	9.091e-25	9.7846e-25	3.5842e-07	1.8981e-07	4.0283e-14	1.5325e-09	2.0725e-74	0.00020815	0.0043649	3.4863e-06	0.00013807	1.9441e-17	4.4359e-16	1.9071e-23	6.4822e-10	1.5913e-07
G4 vs. G3b	P-value	0.0373274	0.0726349	0.997735	0.824553	0.0307822	0.00525451	0.540461	0.997293	0.0309489	9.123e-25	5.5963e-18	0.76951	1.2994e-09	3.9504e-12	1.0488e-07	9.7547e-45	3.6534e-05	0.00516564	4.291e-06	5.2717e-06	0.00168658	7.0397e-15	0.0245525	0.0114994	2.4155e-06
	FDR	0.0717834	0.0907936	1.08449	1.14521	0.085506	0.0187661	4.50384	1.03885	0.0309489	3.8012e-24	2.7981e-17	1.92378	1.7097e-09	8.2299e-12	2.3837e-07	2.4387e-43	4.3493e-05	0.00587004	7.6624e-06	8.2371e-06	0.0105411	2.1999e-14	0.306906	0.0191656	3.5522e-06
G4 vs. G3a	P-value	0.435536	0.338491	0.404904	0.594695	0.261008	0.825791	0.219391	0.751615	0.160937	5.2055e-24	1.7286e-21	0.0332873	8.7348e-11	5.6558e-12	0.00076106	9.734e-48	0.00530581	0.189264	2.1581e-05	0.00219675	5.1583e-07	2.0116e-15	4.4793e-09	3.966e-08	0.00777653
	FDR	0.494927	0.423114	0.482029	0.646408	0.343431	0.825791	0.30471	0.782932	0.251464	6.5069e-23	1.4405e-20	0.0554788	3.6395e-10	2.8279e-11	0.00172967	2.4335e-46	0.0102035	0.278329	5.3953e-05	0.00457656	1.4328e-06	1.2572e-14	1.5997e-08	1.2394e-07	0.0138867
G4 vs. G2	P-value	0.0220233	0.621498	0.286815	0.0008988	0.0173299	0.0123946	1.1014e-05	0.927356	0.183935	2.7104e-25	1.6731e-24	0.00048405	1.9306e-07	3.07e-13	1.3842e-07	6.5377e-52	0.00293242	0.0520547	2.0946e-05	0.00273358	0.00011805	2.4e-15	7.5103e-12	0.00030491	3.641e-05
	FDR	0.0250265	0.776873	0.341447	0.00097696	0.0228025	0.0123946	1.5298e-05	0.965995	0.287398	3.388e-24	1.3942e-23	0.00080675	8.0443e-07	1.535e-12	3.1459e-07	1.6344e-50	0.00563927	0.0765511	5.2365e-05	0.00569495	0.00032791	1.5e-14	2.6822e-11	0.00095285	6.5018e-05
G5 vs. G4	P-value	0.0009806	0.0721203	0.450826	0.770996	0.668338	0.195935	0.245201	0.126752	0.063935	1.1629e-16	4.4714e-05	0.609113	1.1104e-08	0.00506268	1.0955e-07	2.4902e-27	0.105039	0.0377835	0.00023232	0.0569106	0.00227548	1.6303e-07	1.5927e-05	0.0882921	0.0470094
	FDR	0.00272388	0.112688	0.512302	0.770996	0.696186	0.244919	0.291906	0.166779	0.106558	1.4536e-15	0.00015969	0.66208	9.253e-08	0.0115061	6.8468e-07	6.2255e-26	0.145887	0.0787156	0.00072599	0.101626	0.00568871	8.1514e-07	6.6361e-05	0.129841	0.0904026
FDR, false discovery rate; CK, creatinine kinase; miR, microRNA., CK-MB, CK-myocardial band; Con, healthy controls; G1, diabetes without kidney neuropathy; G2, diabetes with mild renal impairment; G3s-G5, diabetes with severe renal impairment.
